# Supplementary material for: Osteoblast-derived vesicles induce a switch from bone-formation to bone-resorption in vivo
Source: PubMed Central journal article supplement (PMC8873258; doi:10.1038/s41467-022-28673-2), 2022-02-24
Supplement: 41467_2022_28673_MOESM1_ESM.pdf [file 41467_2022_28673_MOESM1_ESM.pdf]

## Supplementary Information

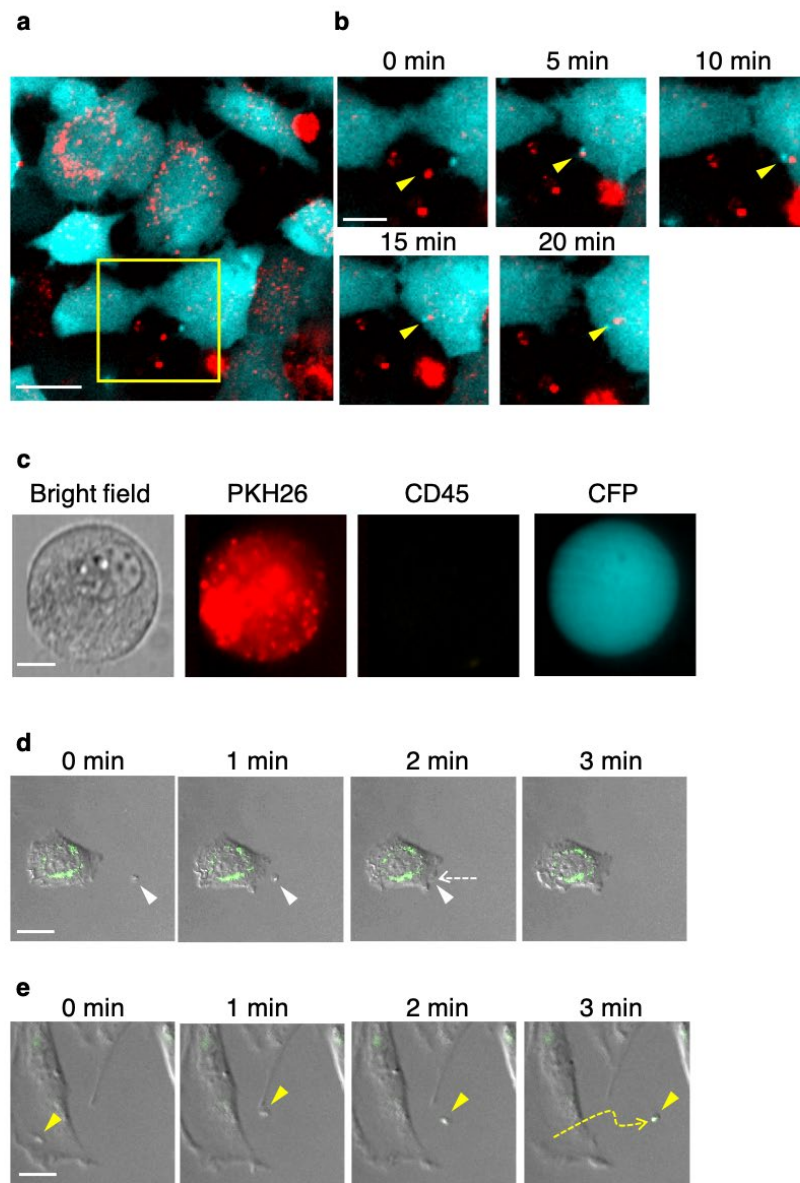

**Supplementary Fig. S1. Communication among osteoblasts via small osteoblast vesicles *in vitro*.**

**a–c,** Visualization of PKH-labeled SOV uptake *in vitro*. **(a)** A representative image of primary osteoblasts from Col2.3-ECFP mice treated with PKH-labeled SOVs

isolated from mOBs (at least three independent experiments). Red: PKH-labeled SOVs; cyan: mOBs. Scale bars: 20  $\mu\text{m}$ . **(b)** Uptake of PKH-labeled SOVs by mOBs. Consecutive time-lapse images in yellow lines in **(a)**. Arrowheads represent PKH-labeled SOVs taken up by mOBs. Scale bars: 10  $\mu\text{m}$ . **(c)** Representative flow cytometry images. Primary osteoblasts treated with PKH26-labeled SOVs expressed CFP and PKH26, but they did not express CD45. Scale bar: 10  $\mu\text{m}$ . **d, e**, Visualization of the uptake **(d)** and release **(e)** of CD63-EGFP-positive SOVs by CD63-EGFP-expressing MC3T3-E1 cells (at least three independent experiments). Green: CD63-EGFP. Arrowheads and dotted lines represent CD63-EGFP-positive SOVs and their tracks, respectively. Scale bar: 20  $\mu\text{m}$ .

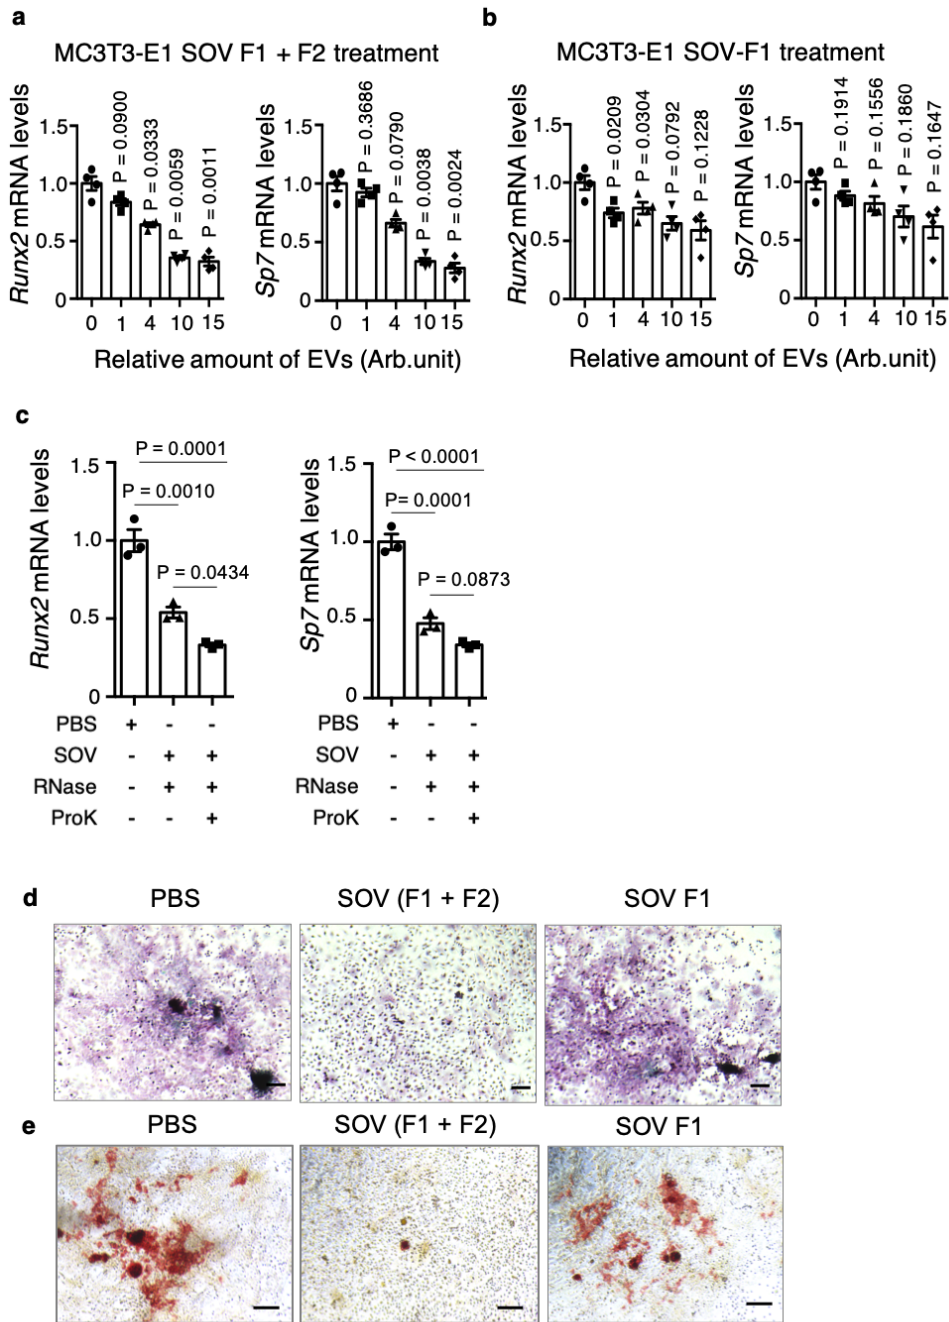

**Supplementary Fig. S2. SOV-F2 inhibits osteoblast differentiation *in vitro*.**

**a, b**, *Runx2* and *Sp7* mRNA levels in MC3T3-E1 cells treated with total SOVs (F1 + F2) (**a**) or SOV-F1 (**b**) (n = 4 independent experiment per group). **c**, Effect of RNase and proteinase K (ProK)-treated SOVs on osteoblast differentiation.

*Runx2*, and *Sp7* mRNA levels in osteoblasts treated with PBS, total SOVs (F1+F2) with RNase, or total SOVs (F1 + F2) with RNase and ProK (n = 3 independent experiment per group). SOV: total SOVs (F1 + F2). **d**, Representative images of Fast Green/Sirius Red staining in osteoblasts treated with PBS, total SOVs (F1 + F2), or SOV-F1 (n = 3 independent experiments per group). Scale bar: 200  $\mu$ m. **e**, Representative images of Alizarin Red S staining of osteoblasts treated with PBS, total SOVs (F1 + F2), or SOV-F1 (n = 3 independent experiments per group). Scale bar: 200  $\mu$ m. Data are means  $\pm$  SEMs. Statistical significance was determined by one-way ANOVA with Dunnett's multiple comparison *post hoc* test in (**a**, **b**, and **c**).

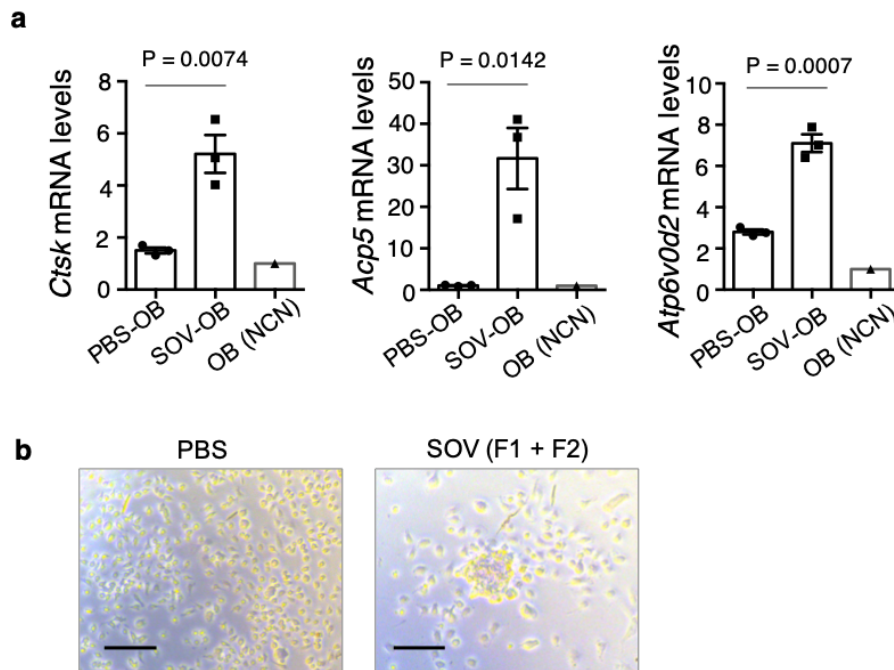

**Supplementary Fig. S3. Total SOV treated osteoblasts promote osteoclast differentiation *in vitro*.**

**a**, Mature osteoclast (mOC) marker genes (*Ctsk*, *Acp5*, and *Atp6v0d2*) mRNA levels in BMMs co-cultured with PBS-treated osteoblasts (PBS-OB) or BMMs co-cultured with total SOV-treated osteoblasts (SOV-OB) (n = 3 biological replicates per group). Expression levels of mOC marker genes in primary osteoblast culture as a negative control [OB(NCN)] (n = 1). **b**, Representative images of TRAP staining of BMMs with PBS or BMMs with total SOV (F1 + F2) for 3 days on macrophage colony-stimulating factor (M-CSF) (n = 8 independent experiments per group). There were no significant positive areas in either group. Bar = 100  $\mu$ m. Data are means  $\pm$  SEMs. Statistical significance was determined by two-tailed unpaired *t*-test in (a).

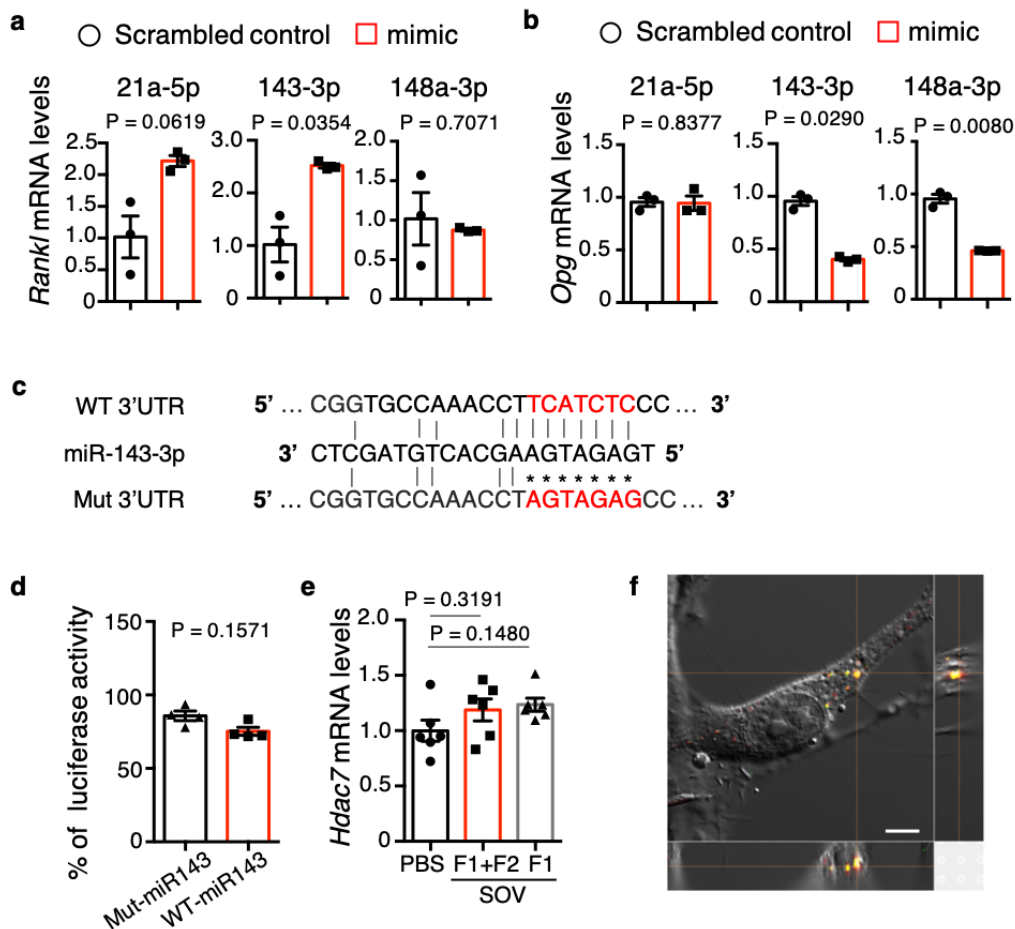

**Supplementary Fig. S4. Effects of miR-143-3p on osteoblasts *in vitro*.**

**a, b**, *Rankl* (**a**) and *Opg* (**b**) mRNA levels in MC3T3-E1 cells transfected with scrambled control, miR-21a-5p, miR-143-3p, or miR-148a-3p mimics (n = 3 independent experiment per group). **c–e**, Effect of miR-143-3p in mature osteoblast-derived SOVs on *Hdac7* expression. The *Hdac7* 3' UTR was cloned into luciferase reporter vectors. WT 3' UTR: WT sequence of the *Hdac7* 3' UTR; miR-143-3p: miR-143-3p sequence; Mut 3' UTR: mutated sequence of the *Hdac7* 3' UTR (**c**), percentages of luciferase activity Mut-miR143: mutated *Hdac7* construct with miR-143-3p mimics; WT-miR143: WT *Hdac7* construct with miR-

143-3p mimics. (n = 4 independent experiment per group) (**d**), and *Hdac7* mRNA levels in primary osteoblasts treated with PBS, total SOVs (F1 + F2), or SOV-F1 (n = 6 biological replicates per group) (**e**). **f**, A representative image of MC3T3-E1 cells capturing miR-143-3p-containing SOVs (n = 4 independent experiments). Red: miR-143-3p; green: SOVs; yellow: miR-143-3p-containing SOVs. Scale bar: 5  $\mu$ m. Data are means  $\pm$  SEMs. Statistical significance was determined by two-tailed paired *t*-test in (**a**, **b**, and **d**) and by one-way ANOVA with Dunnett's multiple comparison *post hoc* test in (**e**).

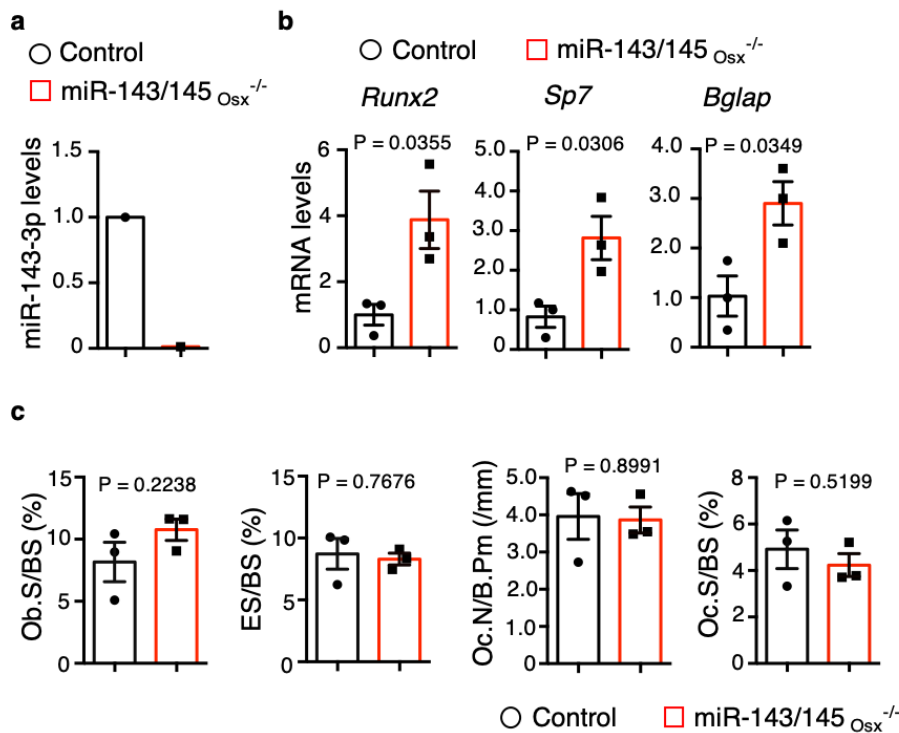

**Supplementary Fig. S5. Effects of osteoblast-specific deletion of miR-143/145 in mice *in vitro* and *in vivo*.**

**a**, Expression levels of miR-143-3p in primary osteoblasts of 9-week-old control and osteoblast-specific miR-143/145 KO (miR-143/145<sub>Osx</sub><sup>-/-</sup>) mice (n = 1 from 3 mice). **b**, *Runx2*, *Sp7*, and *Bglap* mRNA levels in primary osteoblasts of 9-week-old control and miR-143/145<sub>Osx</sub><sup>-/-</sup> mice (n = 3 biological replicates per group). **c**, Bone morphometric analysis of metaphyseal regions of distal femurs of 9-week-old control and miR-143/145<sub>Osx</sub><sup>-/-</sup> mice (n = 3 biological replicates per group). BS: bone surface, Ob.S: osteoblast surface; ES: eroded surface; Oc.N: osteoclast number; Oc.S: osteoclast surface; B.Pm: bone perimeter. Data are means ± SEMs. Statistical significance was determined by two-tailed unpaired *t*-test in (**b**) and (**c**).



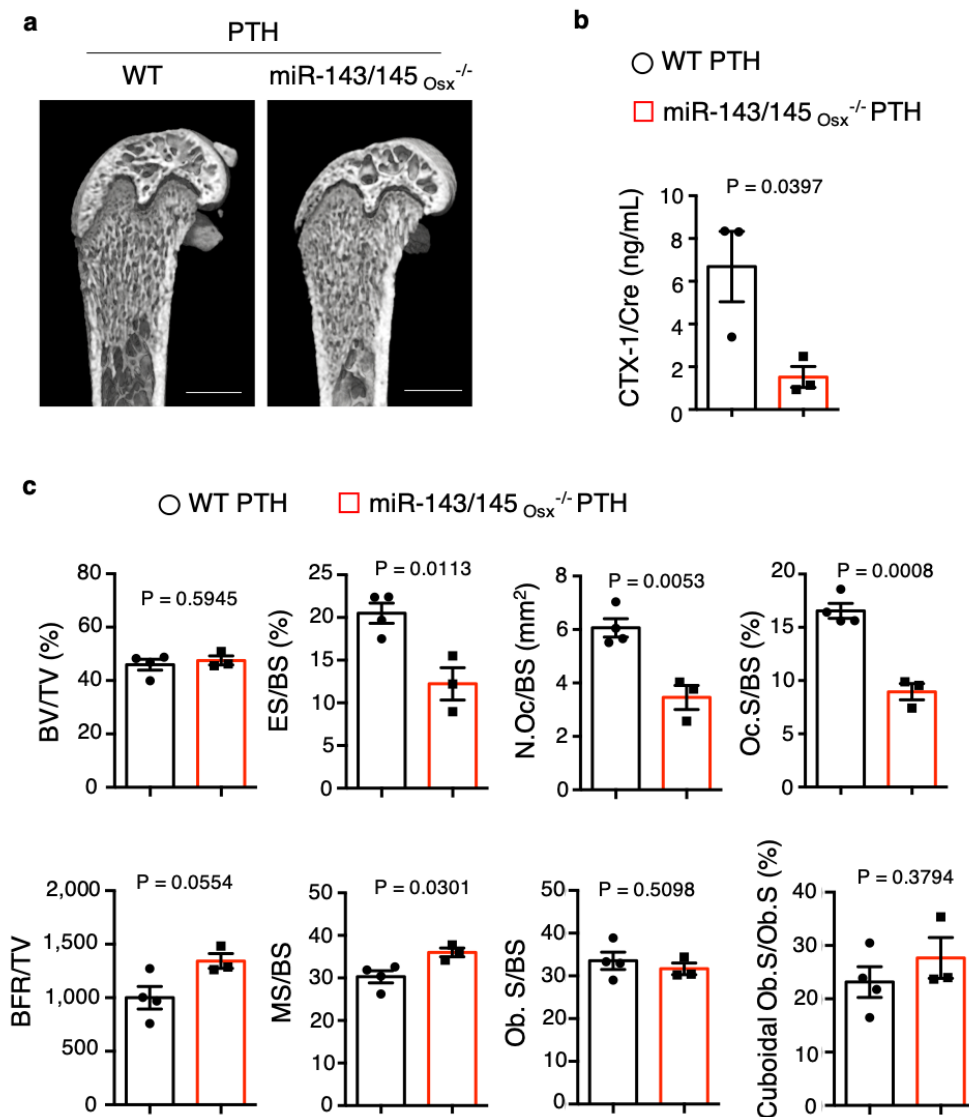

**Supplementary Fig. S6. miR-143/145 conditional knockout decreases osteoclast activity after parathyroid hormone administration *in vivo*.**

**a**, Representative micro-CT images of the femurs of 9-week-old wild-type (WT) (n = 4 biological replicates) and osteoblast-specific miR-143/145 KO (miR-143/145<sup>Osx<sup>-/-</sup></sup>) mice (n = 3 biological replicates) after intermittent parathyroid hormone (PTH) injections. Scale bars: 1000 μm. **b**, Urine CTX-1 levels (corrected

for urine creatinine) in PTH-treated WT mice (WT PTH) and PTH-treated miR-143/145<sup>O<sub>sx</sub>-/-</sup> mice (miR-143/145<sup>O<sub>sx</sub>-/-</sup> PTH) (n = 3 biological replicates per group).

**c**, Bone morphometric analyses of metaphyseal regions of distal femurs of 9-week-old PTH-treated WT (n = 4 biological replicates) and PTH-treated miR-143/145<sup>O<sub>sx</sub>-/-</sup> mice (n = 3 biological replicates). BV: bone volume; TV: tissue volume; ES: eroded surface; BS: bone surface; N.Oc: osteoclast number; Oc.S: osteoclast surface. Data are means ± SEMs. Statistical significance was determined by two-tailed unpaired *t*-test in (**b** and **c**).

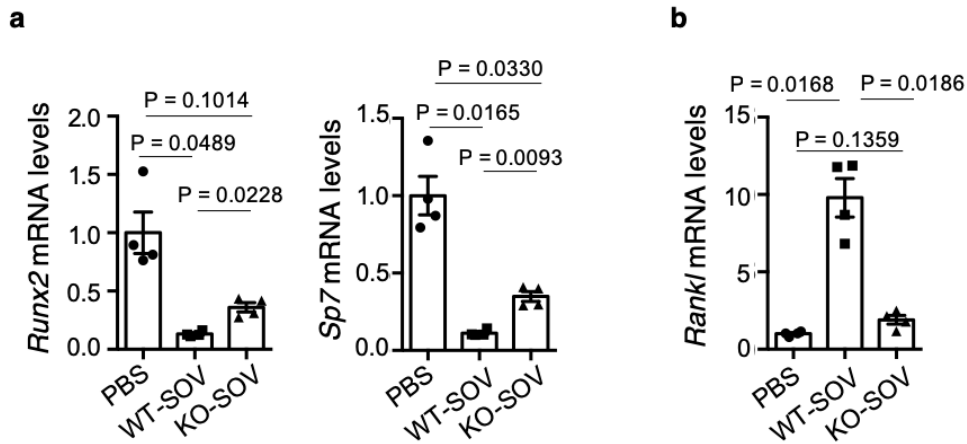

**Supplementary Fig. S7. MiR-143/145-deleted SOVs reverse the effects of SOVs on osteoblasts.**

**a, b,** Reversal of SOV effects on osteoblasts by miR-143/145-deleted SOVs. *Runx2*, *Sp7* (**a**), and *Rankl* (**b**) mRNA levels in primary osteoblasts treated with PBS, WT-derived SOVs (WT-SOV), or miR-143/145<sub>Osx</sub><sup>-/-</sup> derived SOVs (KO-SOV) (n = 4 biological replicates per group). Data are means ± SEMs. Statistical significance was determined by Welch's ANOVA followed by *post hoc* two-tailed Welch's *t*-test with Bonferroni correction in (**a** and **b**).

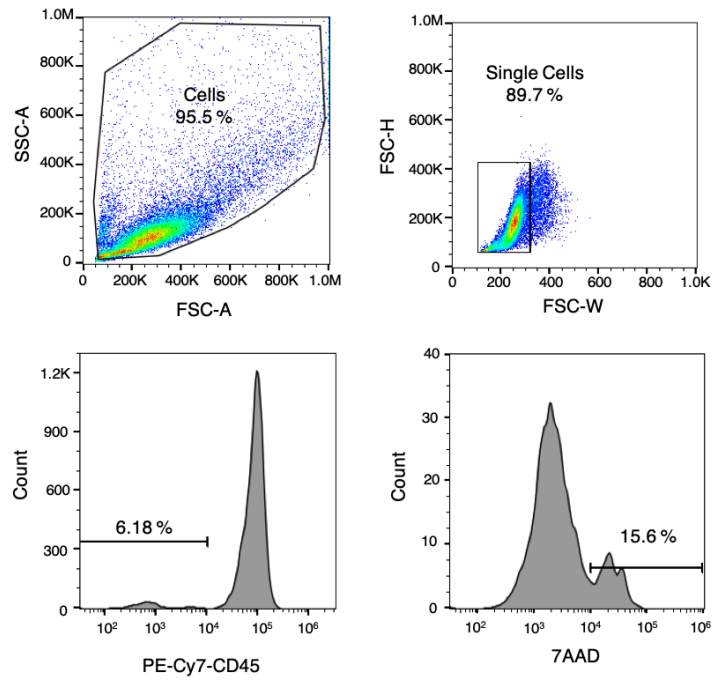

**Supplementary Fig. S8. FACS gating strategy.**

Gating strategies for the evaluation of apoptotic osteoblasts with 7AAD after the treatment of SOVs (Fig. 2).

**Supplementary Table 1: Sequences of oligonucleotide of primers for qPCR and the inserted sequences for the luciferase assay in this study.**

|                 | Forward (5' → 3')       | Revers (5' → 3')       |
|-----------------|-------------------------|------------------------|
| <i>Actb</i>     | CTTCTACAATGAGCTGCGTG    | TCATGAGGTAGTCTGTCAGG   |
| <i>Runx2</i>    | AGGCACAAAGAAGCCATAC     | AATGAGTGAGGGAAGGGT     |
| <i>Sp7</i>      | CATCTGCCTGACTCCTTGGGAC  | GCTGAAAGGTCAGCGTATGGC  |
| <i>Alpl</i>     | CCCAAGGAAAAGAAGCACGTC   | ACATTAGGCGCAGGAAGGTCA  |
| <i>Col1a1</i>   | TGGAAGAGCGGAGAGTACTG    | GATAGGTGATGTTCTGGGAGG  |
| <i>Bglap</i>    | TGGCGACACTTACCGAGCTT    | CCATGCCCTTGTAGTAGCTGTA |
| <i>Rankl</i>    | CAGCATCGCTCTGTTCTGTA    | CTGCGTTTTCATGGAGTCTCA  |
| <i>Opg</i>      | GTTTCCCGAGGACCACAAT     | CCATTCAATGATGTCCAGGAG  |
| <i>Cbfb</i>     | TGTGAGATTAAGTACACGG     | TAATGCATCCTCCTGCTGGGCT |
| <i>Hdac7</i>    | TGAAGAATGGCTTTGCTGTG    | CACTGGGGTCCTGGTAGAAA   |
| <i>Ctsk</i>     | GAAGAAGACTCACCAGAAGCAG  | TCCAGGTTATGGGCAGAGATT  |
| <i>Acp5</i>     | CACTCCCACCCTGAGATTTGT   | CATCGTCTGCACGGTTCTG    |
| <i>Atp6v0d2</i> | CAGAGCTGTACTTCAATGTGGAC | AGGTCTCACACTGCACTAGGT  |

|                                | 5' → 3'                                                                              |
|--------------------------------|--------------------------------------------------------------------------------------|
| <i>Cbfb</i> -sense             | CTAGCGGCCGCTAGTCATCATTGCATCATTTTTTAAAGATTC<br>ATCTCCATTAAACTTGCCTTAAGCTTCCT          |
| <i>Cbfb</i> -antisense         | CTAGAGGAAGCTTAAGGCAAGTTTTAATGGAGATGAATCTT<br>TAAAAATGATGCAATGATGACTAGCGGCCGCTAGAGCT  |
| <i>Cbfb</i> mutant-sense       | CTAGCGGCCGCTAGTCATCATTGCATCATTTTTTAAAGATAG<br>TAGAGCATTAAACTTGCCTTAAGCTTCCT          |
| <i>Cbfb</i> mutant-antisense   | CTAGAGGAAGCTTAAGGCAAGTTTTAATGCTCTACTATCTTT<br>AAAAAATGATGCAATGATGACTAGCGGCCGCTAGAGCT |
| <i>Hdac7</i> -sense            | CTAGCGGCCGCTAGTCTCCTAACCCAACGGTGCCAAACCT<br>TCATCTCCCTTCAAAGCACAAACAATCCCT           |
| <i>Hdac7</i> -antisense        | CTAGAGGGATTGTGTTGTGCTTTTGAAGGGAGATGAAGGTT<br>TGGCACCGTTGGGTTAGGAGACTAGCGGCCGCTAGAGCT |
| <i>Hdac7</i> mutant-sense      | CTAGCGGCCGCTAGTCTCCTAACCCAACGGTGCCAAACCT<br>AGTAGAGCCTTCAAAGCACAAACAATCCCT           |
| <i>Hdac7</i> mutant -antisense | CTAGAGGGATTGTGTTGTGCTTTTGAAGGCTCTACTAGGTT<br>TGGCACCGTTGGGTTAGGAGACTAGCGGCCGCTAGAGCT |
